# Supplementary material
Source: PubMed Central journal article supplement (PMC2903300)

**Supplemental Figure 1. GSTP1 and NQO1 mRNA expression (fold of vehicle-treated control at that time) modulated by the agents in HBEC cells**

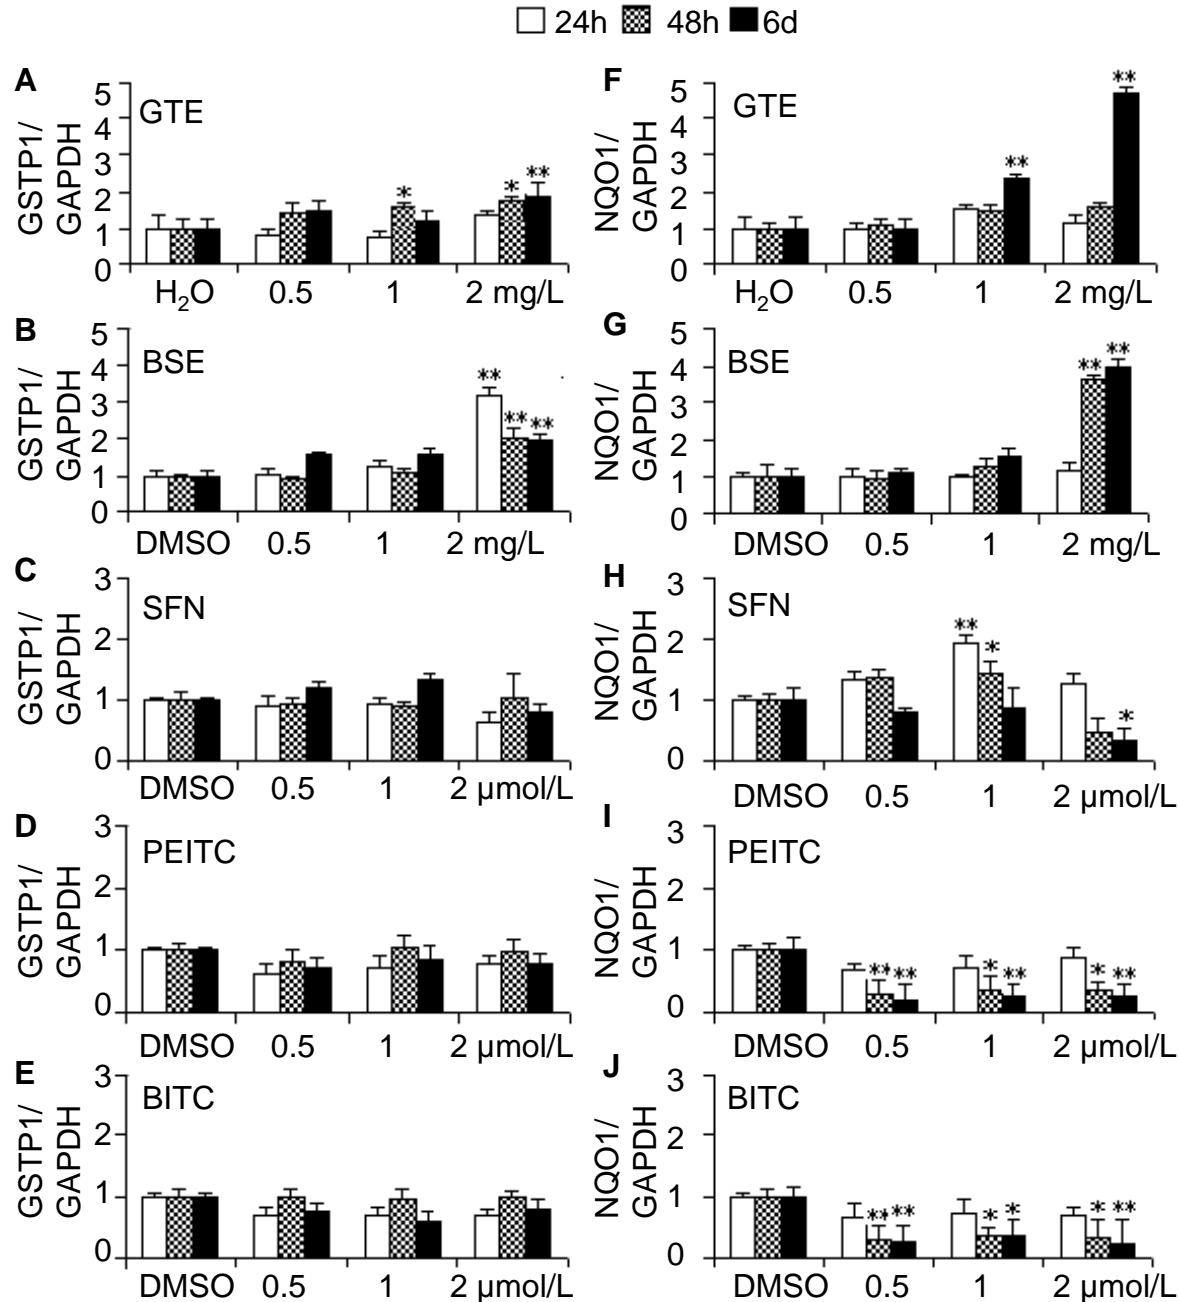

**Supplemental Figure 2. GSTP1 and NQO1 mRNA expression (fold of vehicle-treated control at that time) modulated by the agents in A549 cells**

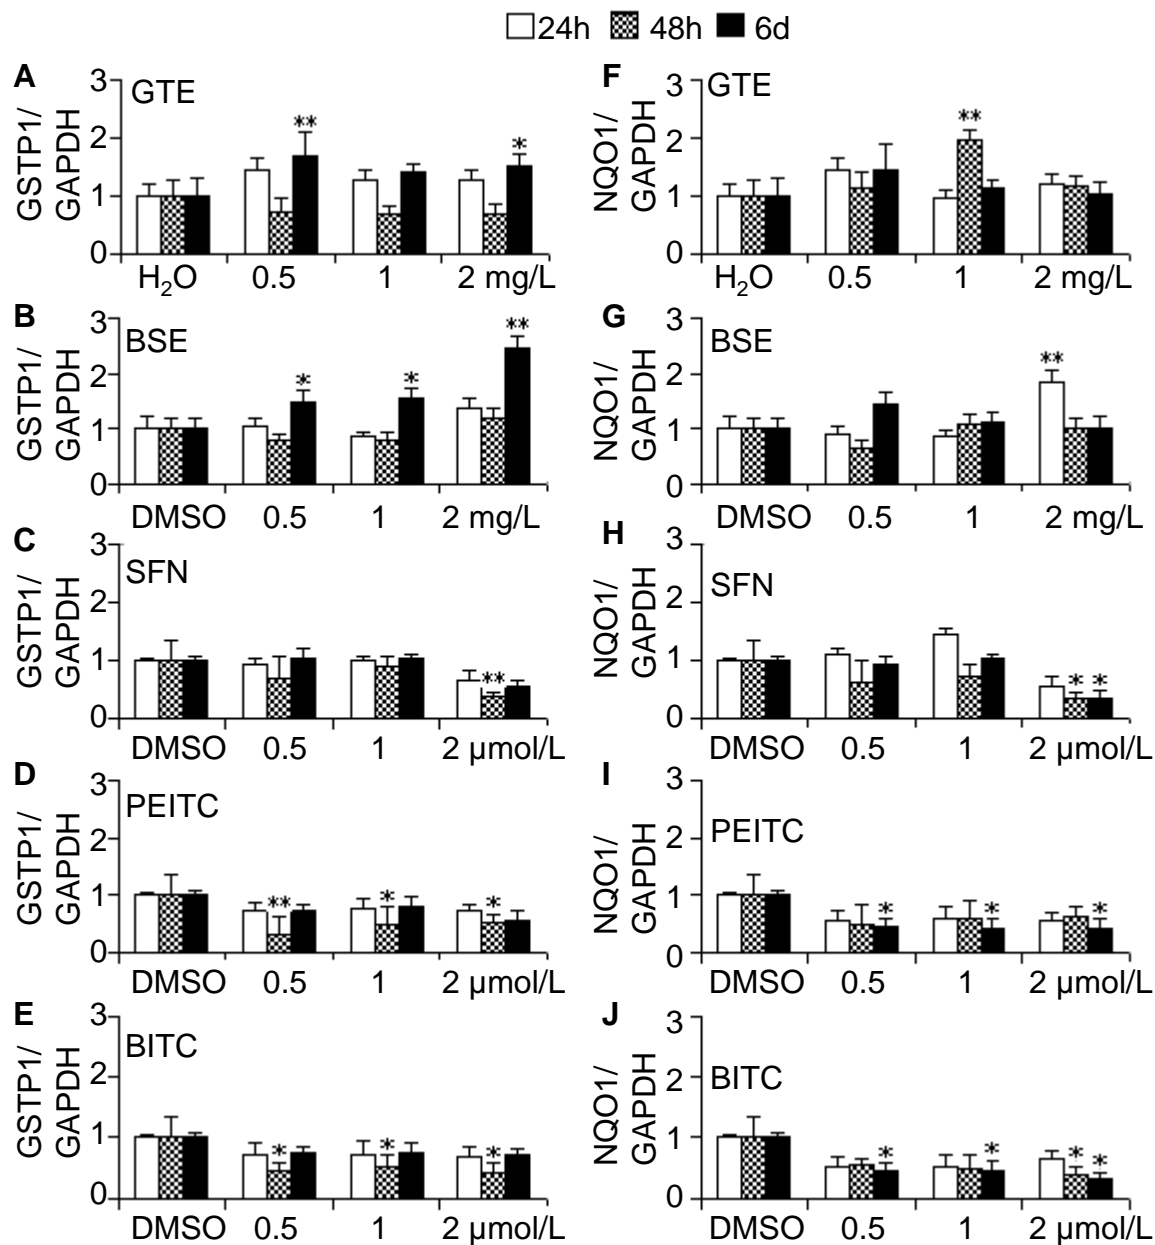

**Supplemental Figure 3. Regulation of GSTP1 and NQO1 protein expression by the chemopreventive agents in HBEC cells**

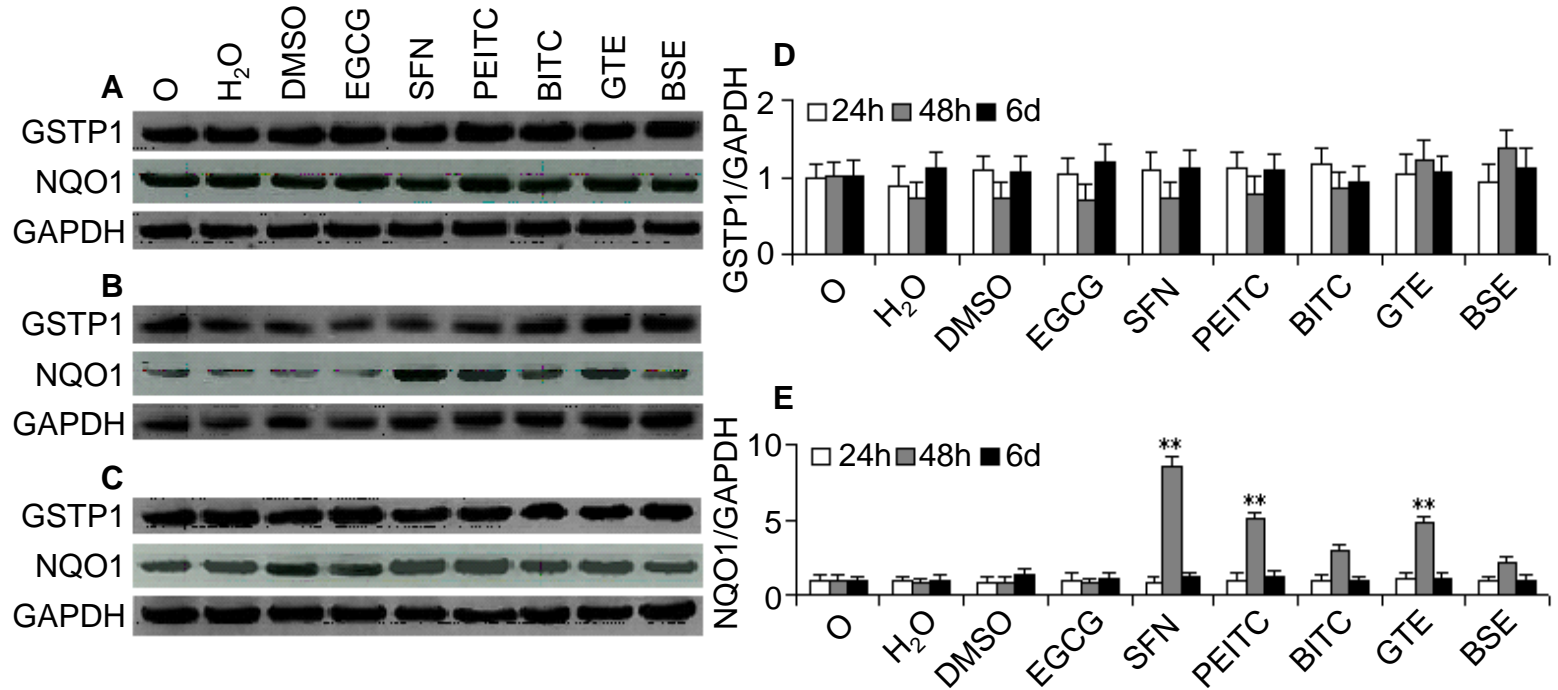

**Supplemental Figure 4. Regulation of GSTP1 and NQO1 protein expression by the chemopreventive agents in A549 cells**

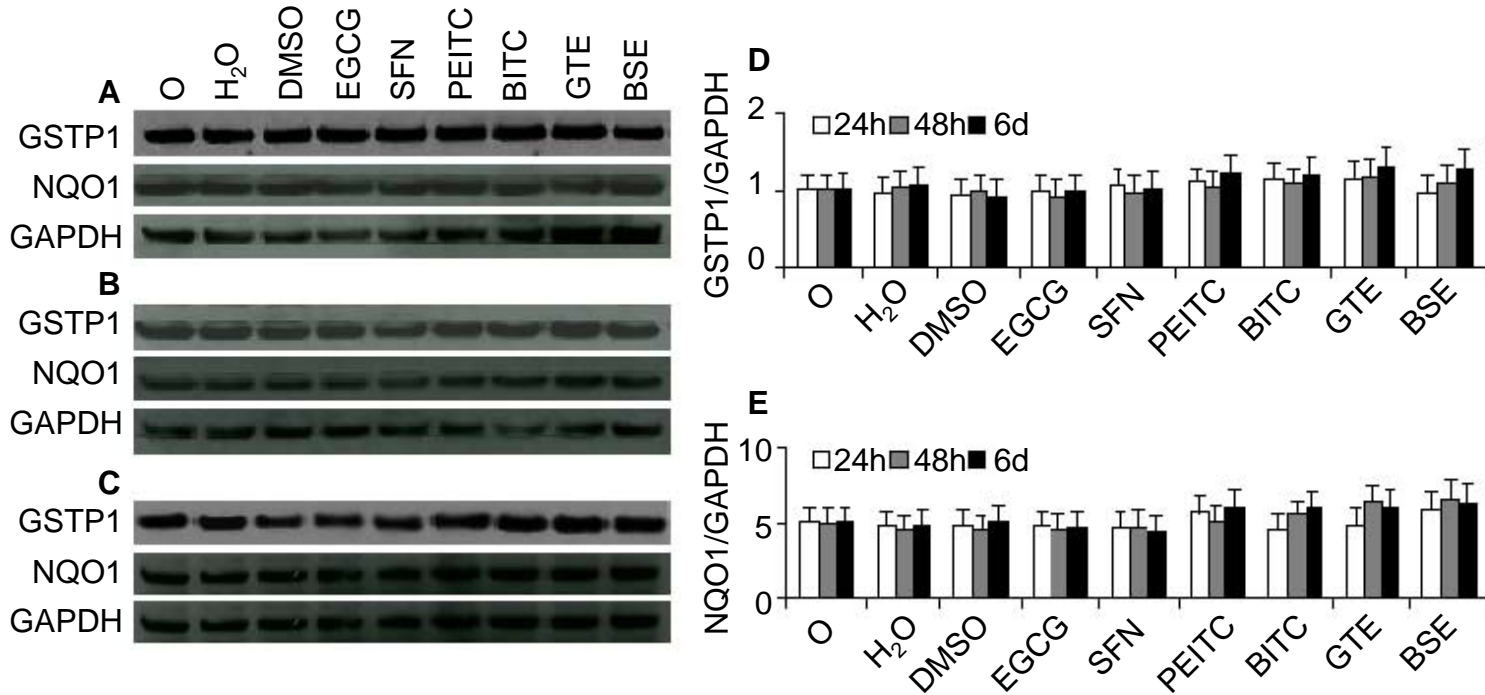

Supplement: jn.110.121905_1.pdf [file jn.110.121905_1.pdf]
